# Supplementary material for: A loss-of-function mutation in RORB disrupts saltatorial locomotion in rabbits
Source: PLOS journal article supplement (doi:10.1371/journal.pgen.1009429), 2021-03-25
Supplement: S1 (10.1371/journal.pgen.1009429.s001) [file journal.pgen.1009429.s001]

**S1 Fig**

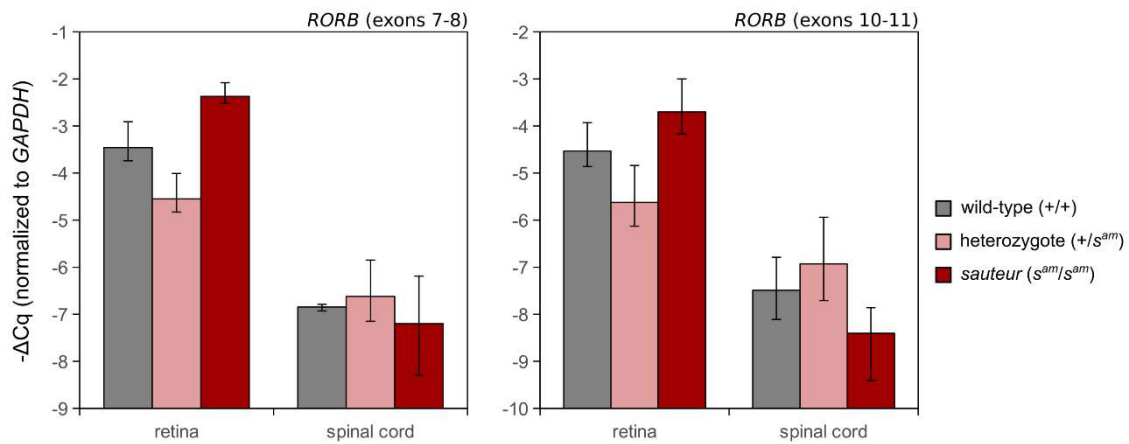

**S1 Fig. Gene expression levels of RORB in the retina and spinal cord.** Gene expression was measured through quantitative RT-qPCR of two amplicons in three rabbit individuals, one per genotype: wild-type (+/+), heterozygote (+/s<sup>am</sup>) and sauteur (s<sup>am</sup>/s<sup>am</sup>). The y-axes indicate a relative measure of expression of each amplicon controlled for the expression of a housekeeping gene (*GAPDH*). Main bars indicate average relative expression, and error bars indicate the minimum and maximum values of three technical replicates for each tissue/individual.
