# Supplementary material for: A loss-of-function mutation in RORB disrupts saltatorial locomotion in rabbits
Source: PLOS journal article supplement (doi:10.1371/journal.pgen.1009429), 2021-03-25
Supplement: S2 (10.1371/journal.pgen.1009429.s002) [file journal.pgen.1009429.s002]

**S1 Table. Whole genome resequencing and read mapping statistics**

| <b>Pool</b>    | <b>Number of individuals pooled</b> | <b>Number of reads</b> | <b>Percentage of reads mapping<sup>a</sup></b> | <b>Percentage of reads MQ <math>\geq 20</math><sup>b</sup></b> | <b>Mean depth of coverage<sup>c</sup></b> |
|----------------|-------------------------------------|------------------------|------------------------------------------------|----------------------------------------------------------------|-------------------------------------------|
| <i>sauteur</i> | 12                                  | 884,371,195            | 98.7% (94.3%)                                  | 89.2%                                                          | 37.6                                      |
| wild-type      | 40                                  | 867,377,377            | 98.8% (94.4%)                                  | 94.0%                                                          | 36.5                                      |

<sup>a</sup>Percentage of properly paired reads is given in parentheses

<sup>b</sup>Reads with a Phred score mapping quality (MQ) equal or higher than 20

<sup>c</sup>Including positions with zero reads mapping
